# Supplementary material for: Gelatin Hydrogels Reinforced by Absorbable Nanoparticles and Fibrils Cured In Situ by Visible Light for Tissue Adhesive Applications
Source: MDPI journal article supplement (doi:10.3390/polym12051113), 2020-05-13
Supplement: s1 [file s1]

## Supplementary Materials

The gelatin gel samples, which were irradiated for a designated time, were immersed in an artificial saliva solution (pH 7), and weighted every 24 h.

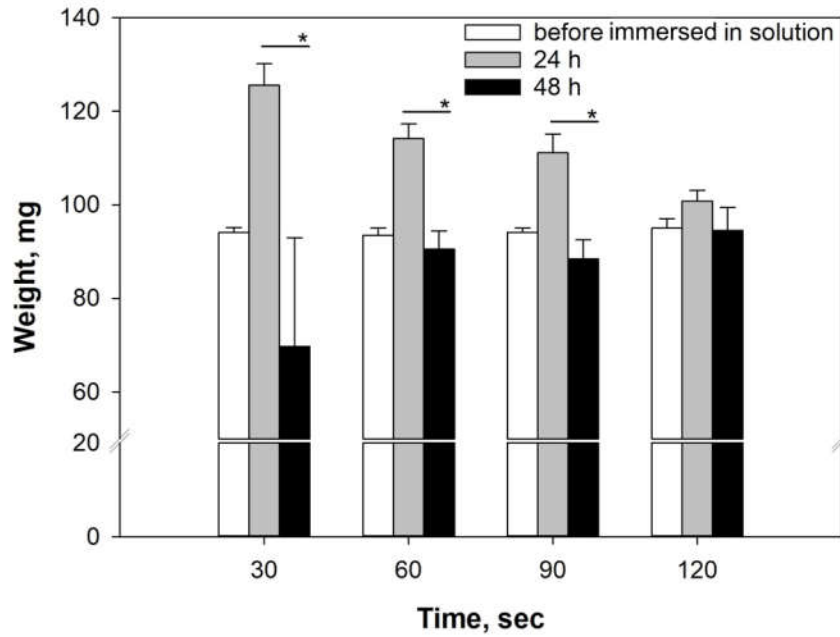

Figure S1: Effect of irradiation time on gelatin gel weight. Data are presented as the mean  $\pm$  SD ( $n=9$ ) and were analyzed using the nonparametric Kruskal–Wallis H-test. Differences of  $p < 0.05$  were considered statistically significant. (\*) denotes a significant difference ( $p < 0.05$ )
